# Supplementary material for: New insights into interfacial photocharge transfer in TiO2/C3N4 heterostructures: effects of facets and defects
Source: Royal Society of Chemistry journal article supplement (doi:10.1039/c9nj00027e), 2019-01-01
Supplement: c9nj00027e1.pdf [file c9nj00027e1.pdf]

## Electronic Supplementary Information (ESI)

### New insights into interfacial photocharge transfer in $\text{TiO}_2/\text{C}_3\text{N}_4$ heterostructures: effects of facet and defect

Yuxuan Wu<sup>a</sup>, Li-Min Liu<sup>b,\*</sup>, Xiaoqiang An<sup>c,\*</sup>, Tingcha Wei<sup>a</sup>

<sup>a</sup> Beijing Computational Science Research Center, Beijing 100193, China.

<sup>b</sup> School of Physics, Beihang University, 100191, China.

E-mail: liminliu@buaa.edu.cn

<sup>c</sup> Center for Water and Ecology, State Key Joint Laboratory of Environment Simulation and Pollution Control, School of Environment, Tsinghua University, Beijing 100084, China.

E-mail: xqan@tsinghua.edu.cn

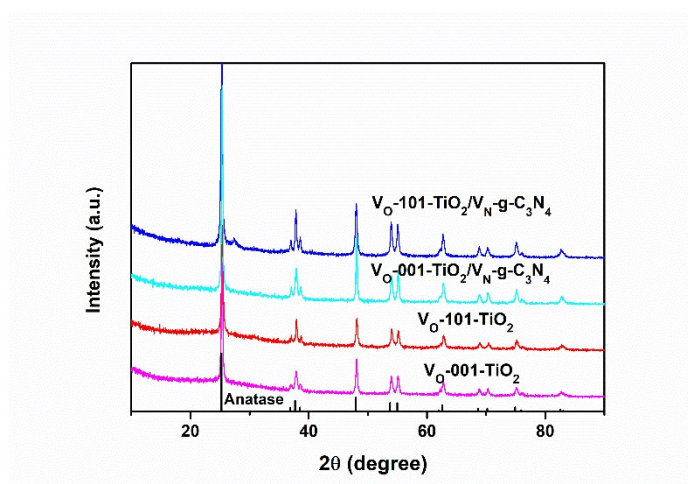

**Fig. S1.** XRD patterns of different types of  $\text{V}_\text{O}$ - $\text{TiO}_2$  and  $\text{V}_\text{O}$ - $\text{TiO}_2/\text{V}_\text{N}$ -g- $\text{C}_3\text{N}_4$  heterostructures.

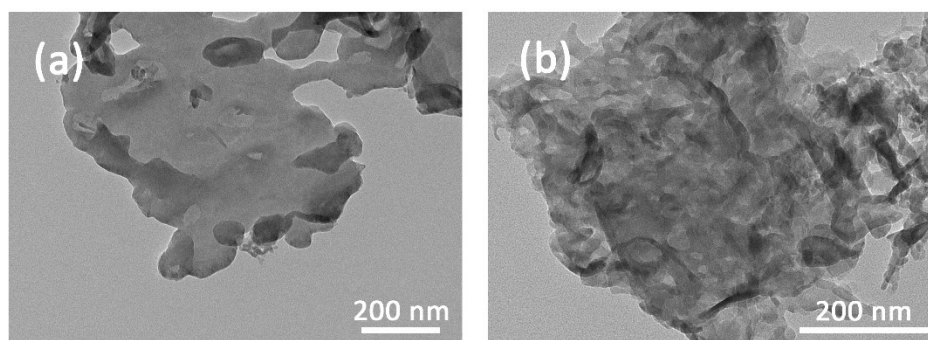

**Fig. S2.** TEM images of g- $\text{C}_3\text{N}_4$  (a) and  $\text{V}_\text{N}$ -g- $\text{C}_3\text{N}_4$  (b).

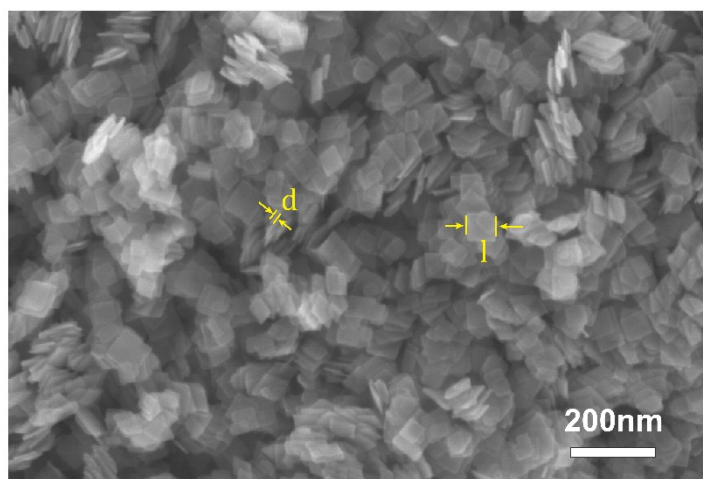

Fig. S3. SEM image of 001-TiO<sub>2</sub> nanosheets. The average length (l) and average thickness (d) of nanosheets are determined to be 55 and 5nm, separately.

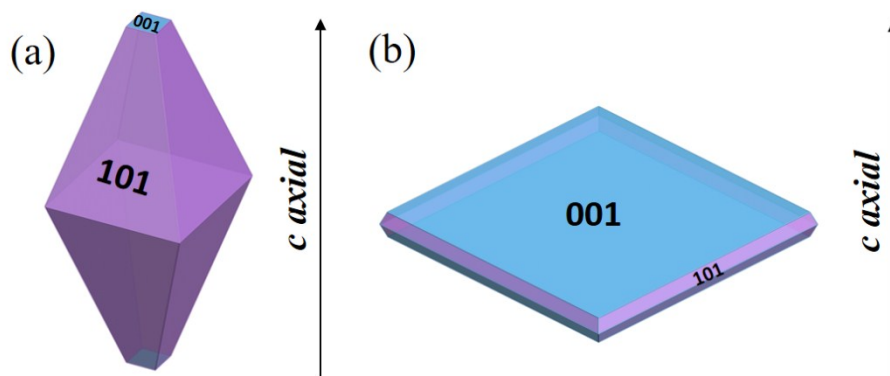

Fig. S4. Schematic illustration of 101-TiO<sub>2</sub> (a) and 001-TiO<sub>2</sub> (b).

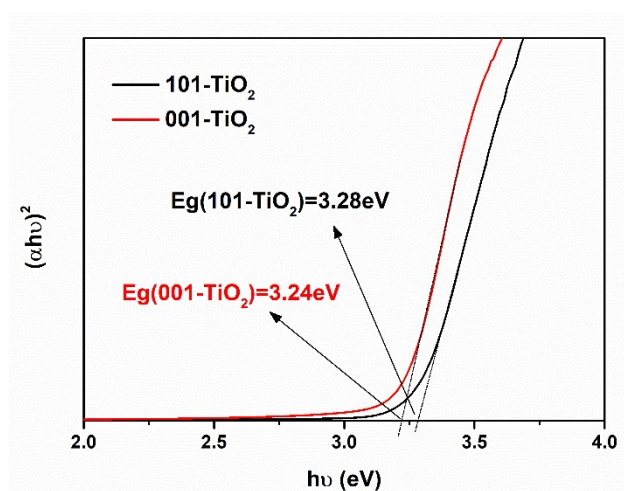

Fig. S5. Kubelka-Munk function curves plotted against photon energy for 101- and 001-faceted TiO<sub>2</sub>.

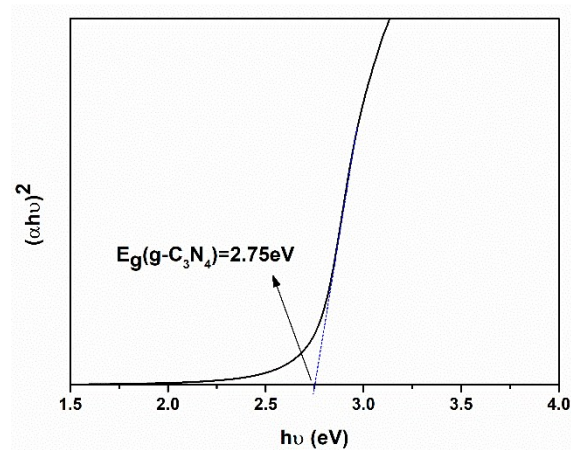

**Fig. S6.** Kubelka-Munk function curve plotted against photon energy for g-C<sub>3</sub>N<sub>4</sub>.

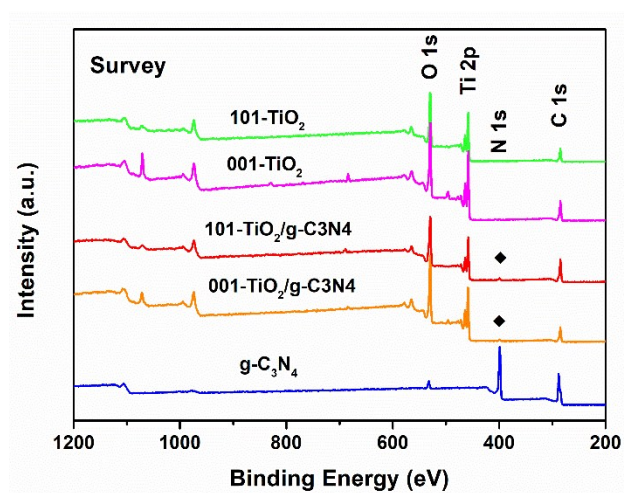

**Fig S7.** XPS survey spectra of g-C<sub>3</sub>N<sub>4</sub>, 101-TiO<sub>2</sub>, 001-TiO<sub>2</sub>, 101-TiO<sub>2</sub>/g-C<sub>3</sub>N<sub>4</sub> and 001-TiO<sub>2</sub>/g-C<sub>3</sub>N<sub>4</sub>.

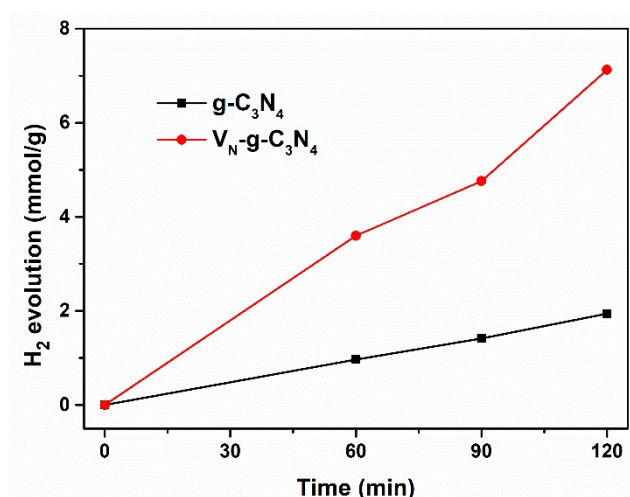

**Fig. S8.** Time course of photocatalytic H<sub>2</sub> evolution over g-C<sub>3</sub>N<sub>4</sub> and V<sub>N</sub>-g-C<sub>3</sub>N<sub>4</sub>.

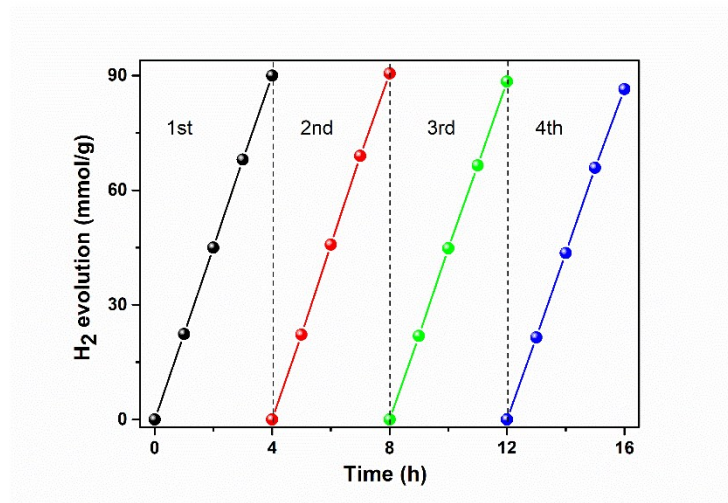

**Fig. S9.** The recyclability tests of the  $V_{O-101}\text{-TiO}_2/V_{N-g}\text{-C}_3\text{N}_4$  for hydrogen evolution.

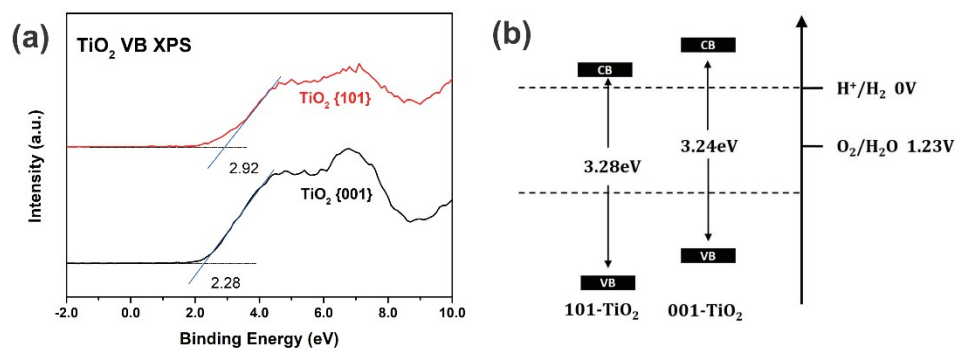

**Fig. S10.** (a) Valence-band (VB) XPS spectra of 101- and 001-faceted  $\text{TiO}_2$ . (b) Band positions of 101- $\text{TiO}_2$  and 001- $\text{TiO}_2$ .

**Table S1.** Calculated facet percentage of 101- $\text{TiO}_2$  and 001- $\text{TiO}_2$

| Sample              | l/nm | d/nm | {001} facets % | {101} facets % |
|---------------------|------|------|----------------|----------------|
| 101- $\text{TiO}_2$ | 13   | 24   | 2.7            | 97.3           |
| 001- $\text{TiO}_2$ | 55   | 5    | 82.8           | 17.2           |

**Table S2.** Elemental analysis of  $g\text{-C}_3\text{N}_4$  and  $V_{N-g}\text{-C}_3\text{N}_4$

| Samples                        | N (wt%) |                    |                    | C (wt%) | C/N mole ratio |
|--------------------------------|---------|--------------------|--------------------|---------|----------------|
|                                | C-N-C   | N-(C) <sub>3</sub> | C-N-H <sub>x</sub> |         |                |
| $g\text{-C}_3\text{N}_4$       | 21.03   | 25.09              | 12.36              | 41.52   | 0.710          |
| $V_{N-g}\text{-C}_3\text{N}_4$ | 33.00   | 15.53              | 8.19               | 43.18   | 0.761          |
